# Supplementary material for: Men and Miscarriage: A Systematic Review and Thematic Synthesis
Source: PubMed Central journal article supplement — Qual Health Res. 2019 Sep 16;30(1):133–45. doi: 10.1177/1049732319870270 (PMC7322941; doi:10.1177/1049732319870270), 2019-09-16
Supplement: Manuscript_QHR_S1_20190714.pdf [file Manuscript_QHR_S1_20190714.pdf]

# Men and Miscarriage: a Systematic Review and Thematic Synthesis

---

## Supplementary Text S1: Medline Search Query

[exp abortion, threatened/ OR exp abortion, incomplete/ OR exp abortion, missed/ OR exp abortion, habitual/ OR \*abortion, spontaneous/ OR blighted ov\*.mp OR miscarriag\*.mp OR [pregnan\* adj3 fail\*].mp OR [pregnan\* adj3 loss\*].mp

AND

[exp focus groups/ OR exp interview/ OR exp interview, psychological/ OR exp interviews as topic/ OR exp narration/ OR exp personal narratives/ OR focus group\*.mp OR interview\*.mp OR narrat\*.mp OR \*psychology, social/ OR exp psychology, applied/ OR exp attitude/ OR exp behavioral symptoms/ OR exp behavioral research/ OR exp stress, psychological/ OR exp psychological trauma/ OR exp psychotherapy/ OR exp adaptation, psychological/ OR exp emotional adjustment/ OR exp emotions/ OR exp family relations/ OR exp interpersonal relations/ OR exp life change events/ OR exp social behavior/ OR exp social norms/ OR exp social values/ OR attitude\*.mp OR behavio?r\*.mp OR emotion\*.mp OR experien\*.mp OR feel\*.mp OR mood\*.mp OR psychotherap\*.mp OR psychosoci\*.mp OR psycholog\*.mp OR exp grounded theory/ OR exp qualitative research/ OR content analy\*.mp OR ethnog\*.mp OR framework analy\*.mp OR grounded theor\*.mp OR mixed?method\*.mp OR phenomenolog\*.mp OR qualitative\*.mp OR thematic\*.mp OR theme\*.mp]

NOT

exp animals/ not humans.sh
