# Supplementary material for: Men and Miscarriage: A Systematic Review and Thematic Synthesis
Source: PubMed Central journal article supplement — Qual Health Res. 2019 Sep 16;30(1):133–45. doi: 10.1177/1049732319870270 (PMC7322941; doi:10.1177/1049732319870270), 2019-09-16
Supplement: Manuscript_QHR_S2_20190714.pdf [file Manuscript_QHR_S2_20190714.pdf]

# Men and Miscarriage: a Systematic Review and Thematic Synthesis

## Supplementary Table S2: Study Characteristics

| Study               | Location       | Setting                                           | Design and Data Collection                                                                                                      | Sampling                            | Male-Female | Males                                |
|---------------------|----------------|---------------------------------------------------|---------------------------------------------------------------------------------------------------------------------------------|-------------------------------------|-------------|--------------------------------------|
| 1 <sup>1,2</sup>    | Australia      | Primary care, or outside the care establishment   | In-depth semi-structured or unstructured interviews performed with individuals face-to-face                                     | Snowball                            | Mixed       | 6                                    |
| 2 <sup>3</sup>      | United States  | Primary care                                      | Unstructured and semi-structured interviews, performed with individuals face-to-face, supplemented by investigator observations | Purposive                           | Male        | 4                                    |
| 3 <sup>4</sup>      | United Kingdom | Social care                                       | In-depth interviews performed face-to-face (individually or with others unspecified)                                            | Purposive and snowball              | Mixed       | 1                                    |
| 4 <sup>5</sup>      | United States  | Outside the care establishment                    | Semi-structured in-depth interviews, performed face-to-face or via telephone, with partners together                            | Convenience and snowball            | Mixed       | 20                                   |
| 5 <sup>6</sup>      | Australia      | Primary and secondary care                        | Questionnaires completed individually                                                                                           | Purposive                           | Mixed       | 32                                   |
| 6 <sup>7,8</sup>    | Ireland        | Secondary care                                    | Semi-structured interviews performed face-to-face (individually except in one case)                                             | Purposive                           | Mixed       | 5                                    |
| 7 <sup>9</sup>      | United States  | Outside the care establishment                    | Questionnaires completed individually                                                                                           | Convenience                         | Mixed       | 21                                   |
| 8 <sup>10</sup>     | Australia      | Regional, rural and remote emergency departments  | Semi-structured interviews performed with individuals face-to-face on two occasions, and via telephone on nine occasions        | Purposive and theoretical           | Mixed       | 2                                    |
| 9 <sup>11</sup>     | Sweden         | Secondary care                                    | Interviews performed face-to-face with partners together                                                                        | Purposive and theoretical           | Mixed       | 6                                    |
| 10 <sup>12</sup>    | Israel         | Outside the care establishment                    | Interviews performed with individuals face-to-face                                                                              | Snowball                            | Mixed       | 5                                    |
| 11 <sup>13</sup>    | United States  | Unspecified                                       | Interviews performed face-to-face with partners together                                                                        | Unspecified                         | Mixed       | 16                                   |
| 12 <sup>14,15</sup> | United States  | Unspecified                                       | Unstructured interviews performed with individuals face-to-face                                                                 | Convenience                         | Mixed       | 6                                    |
| 13 <sup>16,17</sup> | United Kingdom | Secondary care                                    | Semi-structured interviews performed with individuals face-to-face                                                              | Convenience                         | Male        | 10 <sup>16</sup><br>20 <sup>17</sup> |
| 14 <sup>18</sup>    | Qatar          | Secondary care                                    | Semi-structured interviews performed face-to-face with individuals                                                              | Convenience                         | Mixed       | 7                                    |
| 15 <sup>19</sup>    | United Kingdom | Unspecified                                       | Semi-structured interviews performed with individuals face-to-face                                                              | Unspecified                         | Mixed       | 1                                    |
| 16 <sup>20</sup>    | Ireland        | Secondary care                                    | Semi-structured interviews performed with individuals face-to-face except on once via telephone by participant request          | Convenience and snowball            | Mixed       | 6                                    |
| 17 <sup>21</sup>    | Canada         | Secondary care, or outside the care establishment | Unstructured interviews performed with individuals face-to-face on two occasions, and via telephone once                        | Convenience, diversity and snowball | Male        | 8                                    |
| 18 <sup>22,23</sup> | United Kingdom | Outside the care establishment                    | Unstructured in-depth interviews performed with individuals face-to-face                                                        | Snowball                            | Male        | 5                                    |
| 19 <sup>24</sup>    | Australia      | Outside the care establishment                    | Unstructured interviews performed face-to-face with partners together                                                           | Convenience                         | Mixed       | 5                                    |
| 20 <sup>25</sup>    | United States  | Mixed                                             | Focused interviews performed face-to-face with partners together                                                                | Convenience                         | Mixed       | 40                                   |
| 21 <sup>26</sup>    | United Kingdom | Secondary care                                    | Semi-structured interviews performed face-to-face (individually or with others unspecified)                                     | Snowball                            | Mixed       | 4                                    |
| 22 <sup>27</sup>    | United States  | Outside the care establishment                    | Semi-structured interviews performed face-to-face with individuals                                                              | Convenience and snowball            | Male        | 11                                   |

<sup>1</sup>Abboud-2002, <sup>2</sup>Abboud-2005, <sup>3</sup>Armstrong, <sup>4</sup>Brady, <sup>5</sup>Bute, <sup>6</sup>Conway, <sup>7</sup>Cullen-2017, <sup>8</sup>Cullen-2018, <sup>9</sup>Defrain, <sup>10</sup>Edwards, <sup>11</sup>Ekelin, <sup>12</sup>Hamama-Raz, <sup>13</sup>Harris, <sup>14</sup>Hutti-1988, <sup>15</sup>Hutti-1992, <sup>16</sup>Johnson, <sup>17</sup>Puddifoot, <sup>18</sup>Kilshaw, <sup>19</sup>Letherby, <sup>20</sup>Meaney, <sup>21</sup>Miron, <sup>22</sup>Murphy-1997, <sup>23</sup>Murphy-1998, <sup>24</sup>Peters, <sup>25</sup>Radwan-Speraw, <sup>26</sup>Shedev,

<sup>27</sup>Wagner.

| Study               | Gestational Range                            | Multiple Loss or Infertility        | Living Child(ren)    | Focus (Author Descriptions)                                                                                                                                                                                                                                                                                                                                                                                                                                                                                                            |
|---------------------|----------------------------------------------|-------------------------------------|----------------------|----------------------------------------------------------------------------------------------------------------------------------------------------------------------------------------------------------------------------------------------------------------------------------------------------------------------------------------------------------------------------------------------------------------------------------------------------------------------------------------------------------------------------------------|
| 1 <sup>1,2</sup>    | ND* 20 weeks, otherwise unspecified          | Some multiple loss                  | In some cases        | <i>the interpretations and meanings of the miscarriage the woman and her partner place on their experience of a miscarriage<sup>1</sup></i><br><i>[how] a group of women and their partners cope with the miscarriage... [and] participants' experience of, and satisfaction with, health care<sup>2</sup></i>                                                                                                                                                                                                                         |
| 2 <sup>3</sup>      | Between 12 and 20 weeks                      | Unspecified                         | In some cases        | <i>the experience of perinatal loss for fathers, and how the experience influences a father's feelings during future pregnancies<sup>3</sup></i>                                                                                                                                                                                                                                                                                                                                                                                       |
| 3 <sup>4</sup>      | ND* 24 weeks, otherwise unspecified          | None                                | In all cases         | <i>the young person's perspective: the insider account of teenage pregnancy and young parenthood<sup>4</sup></i>                                                                                                                                                                                                                                                                                                                                                                                                                       |
| 4 <sup>5</sup>      | Up to 20 weeks                               | Some multiple loss                  | Unspecified          | <i>the nature of co-ownership in the miscarriage context... [and] the privacy rules that couples develop to manage this information<sup>5</sup></i>                                                                                                                                                                                                                                                                                                                                                                                    |
| 5 <sup>6</sup>      | Between 5 and 16 weeks                       | Some multiple loss                  | In some cases        | <i>the grief response of both the woman and her partner to miscarriage... [and] if support received was adequate and appropriate to their needs<sup>6</sup></i>                                                                                                                                                                                                                                                                                                                                                                        |
| 6 <sup>7,8</sup>    | Between 15 and 19 weeks                      | Some multiple loss                  | In some cases        | <i>women's and their partners' experiences of hospital care during second trimester miscarriage<sup>7</sup></i><br><i>mothers' and fathers' views on the clinical care received in the hospital from the time of diagnosis of the second trimester miscarriage through to follow-up care<sup>8</sup></i>                                                                                                                                                                                                                               |
| 7 <sup>9</sup>      | ND* 20 weeks, otherwise unspecified          | Some multiple loss                  | In some or all cases | <i>the emotional, social, and physical effects of miscarriage on family members... [and] the ways in which family members coped with the loss<sup>9</sup></i>                                                                                                                                                                                                                                                                                                                                                                          |
| 8 <sup>10</sup>     | ND* 20 weeks, otherwise unspecified          | Unspecified                         | Unspecified          | <i>the needs of women, their partners and nursing staff... [and] care of women who present to non-metropolitan EDs with first trimester bleeding<sup>10</sup></i>                                                                                                                                                                                                                                                                                                                                                                      |
| 9 <sup>11</sup>     | Up to 20 weeks                               | Some multiple loss                  | In some cases        | <i>women's and their partners' experiences and ways of handling this diagnosis [unexpected non-viability] in the second trimester of pregnancy<sup>11</sup></i>                                                                                                                                                                                                                                                                                                                                                                        |
| 10 <sup>12</sup>    | Between 10 and 18 weeks                      | Unspecified                         | In all cases         | <i>the meaning ascribed to spontaneous abortion by each member of the [religious Jewish] couple, and how this meaning was expressed in the couple relationship<sup>12</sup></i>                                                                                                                                                                                                                                                                                                                                                        |
| 11 <sup>13</sup>    | Unspecified                                  | Infertility, and some multiple loss | Unspecified          | <i>the transition to parenthood of infertile couples, in which 16 couples describe their experiences with miscarriage<sup>13</sup></i>                                                                                                                                                                                                                                                                                                                                                                                                 |
| 12 <sup>14,15</sup> | 6, 10 or 16 weeks                            | None                                | In 4 out of 6 cases  | <i>reactions to a miscarriage... [and how these reactions] may be related to... the attachment couples feel toward their unborn infant<sup>14</sup></i><br><i>the relation between mothers' and fathers' cognitive representations of miscarriage and their subsequent decisions and actions<sup>15</sup></i>                                                                                                                                                                                                                          |
| 13 <sup>16,17</sup> | Up to 24 weeks                               | Some multiple loss                  | In some cases        | <i>feelings evoked by the pregnancy, the experience of the development of the pregnancy, the ultrasound scan, the actual miscarriage, perceptions of the treatment of their partners and themselves during and after the miscarriage, and the aftermath period<sup>16</sup></i><br><i>a complex set of thoughts, feelings and considerable confusion about appropriate behaviour [among men who experience miscarriage] ... to the extent that such males might feel it necessary to deny their own feelings of grief<sup>17</sup></i> |
| 14 <sup>18</sup>    | Up to 20 weeks                               | Some multiple loss                  | In some cases        | <i>notions of miscarriage causality and risk amongst Qataris<sup>18</sup></i>                                                                                                                                                                                                                                                                                                                                                                                                                                                          |
| 15 <sup>19</sup>    | ND* 24 weeks, otherwise unspecified          | Unspecified                         | In all cases         | <i>the need for a change in focus if we are to understand the experience of miscarriage fully<sup>19</sup></i>                                                                                                                                                                                                                                                                                                                                                                                                                         |
| 16 <sup>20</sup>    | Between 6 and 16 weeks                       | All multiple loss                   | In some cases        | <i>men's and women's accounts of miscarriage... to gain detailed insight into their expectations of pregnancy as well as their experience of miscarriage diagnosis and management<sup>20</sup></i>                                                                                                                                                                                                                                                                                                                                     |
| 17 <sup>21</sup>    | Between 4 and 16 weeks                       | Some multiple loss                  | Unspecified          | <i>men's experiences with the event of their partner's miscarriage<sup>21</sup></i>                                                                                                                                                                                                                                                                                                                                                                                                                                                    |
| 18 <sup>22,23</sup> | Up to 16 weeks                               | Unspecified                         | Unspecified          | <i>men experiencing new depths of disappointment when pregnancy fails... men's feelings... ways in which some men come to terms with their feelings as they try to support their partners... [and] what would have helped<sup>22</sup></i><br><i>the experience of early miscarriage from a male perspective<sup>23</sup></i>                                                                                                                                                                                                          |
| 19 <sup>24</sup>    | ND* 20 weeks, otherwise unspecified          | Infertility, and some multiple loss | None                 | <i>experiences of childlessness despite treatment for infertility... [including] the conflicting constructions of success<sup>24</sup></i>                                                                                                                                                                                                                                                                                                                                                                                             |
| 20 <sup>25</sup>    | Between 6 and 15 weeks                       | Some multiple loss                  | Unspecified          | <i>parents' recollections of the chronologic progression of the miscarriage... things that were most helpful... things that were detrimental to effective coping... [and] what would they change and how would they change it<sup>25</sup></i>                                                                                                                                                                                                                                                                                         |
| 21 <sup>26</sup>    | ND* 24 weeks, otherwise unspecified          | Unspecified                         | Unspecified          | <i>views of women and male partners on health care received during the experience of miscarriage<sup>26</sup></i>                                                                                                                                                                                                                                                                                                                                                                                                                      |
| 22 <sup>27</sup>    | ND* 20 weeks: authors suggest up to 24 weeks | Some multiple loss                  | In some cases        | <i>the lived experiences of fathers who have experienced miscarriage<sup>27</sup></i>                                                                                                                                                                                                                                                                                                                                                                                                                                                  |

<sup>1</sup>Abhoud-2002, <sup>2</sup>Abhoud-2005, <sup>3</sup>Armstrong, <sup>4</sup>Brady, <sup>5</sup>Bute, <sup>6</sup>Conway, <sup>7</sup>Cullen-2017, <sup>8</sup>Cullen-2018, <sup>9</sup>Defrain, <sup>10</sup>Edwards, <sup>11</sup>Ekelin, <sup>12</sup>Hamama-Raz, <sup>13</sup>Harris, <sup>14</sup>Hutti-1988, <sup>15</sup>Hutti-1992, <sup>16</sup>Johnson, <sup>17</sup>Puddifoot, <sup>18</sup>Kilshaw, <sup>19</sup>Letherby, <sup>20</sup>Meaney, <sup>21</sup>Miron, <sup>22</sup>Murphy-1997, <sup>23</sup>Murphy-1998, <sup>24</sup>Peters, <sup>25</sup>Radwan-Speraw, <sup>26</sup>Sehdev,

<sup>27</sup>Wagner.

[\*ND: national definition]
