# Supplementary material for: Men and Miscarriage: A Systematic Review and Thematic Synthesis
Source: PubMed Central journal article supplement — Qual Health Res. 2019 Sep 16;30(1):133–45. doi: 10.1177/1049732319870270 (PMC7322941; doi:10.1177/1049732319870270), 2019-09-16
Supplement: Manuscript_QHR_S3_20190714.pdf [file Manuscript_QHR_S3_20190714.pdf]

# Men and Miscarriage: a Systematic Review and Thematic Synthesis

## Supplementary Table S3: Critical Appraisal

| Manuscript | Was there a clear statement of the aims of the research? | Is a qualitative methodology appropriate? | Was the research design appropriate to address the aims? | Was the recruitment strategy appropriate to the aims? | Were the data collected in a way that addressed the research issue? | Has the relationship between researcher and participants been adequately considered? | Have ethical issues been taken into consideration? | Was the data analysis sufficiently rigorous? | Is there a clear statement of findings? | How valuable is the research? | In your opinion is the paper of high or low overall quality? | In your opinion how conceptually rich is the paper? |
|------------|----------------------------------------------------------|-------------------------------------------|----------------------------------------------------------|-------------------------------------------------------|---------------------------------------------------------------------|--------------------------------------------------------------------------------------|----------------------------------------------------|----------------------------------------------|-----------------------------------------|-------------------------------|--------------------------------------------------------------|-----------------------------------------------------|
| 1          | Yes                                                      | Yes                                       | Yes                                                      | Can't tell                                            | Yes                                                                 | Can't tell                                                                           | Yes                                                | Can't tell                                   | Yes                                     | Valuable                      | High                                                         | Rich                                                |
| 2          | Yes                                                      | Yes                                       | Yes                                                      | Can't tell                                            | Yes                                                                 | Can't tell                                                                           | Yes                                                | Can't tell                                   | Yes                                     | Valuable                      | High                                                         | Rich                                                |
| 3          | Yes                                                      | Yes                                       | Yes                                                      | Can't tell                                            | Yes                                                                 | Can't tell                                                                           | Yes                                                | Yes                                          | Yes                                     | Valuable                      | High                                                         | Rich                                                |
| 4          | Yes                                                      | Yes                                       | Yes                                                      | Can't tell                                            | Can't tell                                                          | No                                                                                   | Yes                                                | Can't tell                                   | Yes                                     | Valuable                      | Unsure                                                       | Poor                                                |
| 5          | Yes                                                      | Yes                                       | Yes                                                      | Yes                                                   | Yes                                                                 | Can't tell                                                                           | No                                                 | Yes                                          | Yes                                     | Valuable                      | High                                                         | Rich                                                |
| 6          | Yes                                                      | Can't tell                                | Can't tell                                               | Yes                                                   | Can't tell                                                          | No                                                                                   | Can't tell                                         | Can't tell                                   | Yes                                     | Can't tell                    | Unsure                                                       | Poor                                                |
| 7          | Yes                                                      | Yes                                       | Yes                                                      | Can't tell                                            | Can't tell                                                          | Can't tell                                                                           | Yes                                                | Can't tell                                   | Yes                                     | Valuable                      | Unsure                                                       | Rich                                                |
| 8          | Yes                                                      | Yes                                       | Yes                                                      | Can't tell                                            | Can't tell                                                          | Can't tell                                                                           | Yes                                                | Can't tell                                   | Yes                                     | Valuable                      | Unsure                                                       | Rich                                                |
| 9          | Yes                                                      | Can't tell                                | Can't tell                                               | Can't tell                                            | Yes                                                                 | No                                                                                   | Can't tell                                         | No                                           | Yes                                     | Can't tell                    | Low                                                          | Rich                                                |
| 10         | Yes                                                      | Yes                                       | Yes                                                      | Can't tell                                            | Yes                                                                 | Can't tell                                                                           | Yes                                                | Can't tell                                   | Yes                                     | Valuable                      | Unsure                                                       | Rich                                                |
| 11         | Yes                                                      | Yes                                       | Yes                                                      | Can't tell                                            | Yes                                                                 | Yes                                                                                  | Yes                                                | Yes                                          | Yes                                     | Valuable                      | High                                                         | Rich                                                |
| 12         | Yes                                                      | Yes                                       | Yes                                                      | Can't tell                                            | Yes                                                                 | Can't tell                                                                           | Yes                                                | Yes                                          | Yes                                     | Valuable                      | High                                                         | Rich                                                |
| 13         | No                                                       | Yes                                       | Can't tell                                               | Can't tell                                            | Can't tell                                                          | Can't tell                                                                           | No                                                 | Can't tell                                   | Yes                                     | Valuable                      | Low                                                          | Unsure                                              |
| 14         | No                                                       | Yes                                       | Can't tell                                               | Can't tell                                            | Can't tell                                                          | Can't tell                                                                           | Can't tell                                         | No                                           | Yes                                     | Not valuable                  | Low                                                          | Rich                                                |
| 15         | Yes                                                      | Yes                                       | Yes                                                      | Can't tell                                            | Yes                                                                 | Can't tell                                                                           | Yes                                                | Yes                                          | Yes                                     | Valuable                      | Unsure                                                       | Poor                                                |
| 16         | Yes                                                      | Yes                                       | Yes                                                      | Yes                                                   | Yes                                                                 | Can't tell                                                                           | Can't tell                                         | Can't tell                                   | Yes                                     | Valuable                      | Unsure                                                       | Rich                                                |
| 17         | Yes                                                      | Yes                                       | Yes                                                      | Can't tell                                            | Yes                                                                 | Can't tell                                                                           | Yes                                                | Yes                                          | Yes                                     | Valuable                      | High                                                         | Unsure                                              |
| 18         | Yes                                                      | Yes                                       | Can't tell                                               | Can't tell                                            | Can't tell                                                          | Yes                                                                                  | Can't tell                                         | No                                           | Yes                                     | Valuable                      | Low                                                          | Poor                                                |
| 19         | Yes                                                      | Yes                                       | Yes                                                      | Yes                                                   | Yes                                                                 | Can't tell                                                                           | Yes                                                | Yes                                          | Yes                                     | Valuable                      | High                                                         | Rich                                                |
| 20         | Yes                                                      | Yes                                       | Yes                                                      | Yes                                                   | Yes                                                                 | Yes                                                                                  | Yes                                                | Yes                                          | Yes                                     | Valuable                      | High                                                         | Rich                                                |
| 21         | Yes                                                      | Yes                                       | Can't tell                                               | Can't tell                                            | Can't tell                                                          | Can't tell                                                                           | Can't tell                                         | No                                           | Yes                                     | Not valuable                  | Low                                                          | Unsure                                              |
| 22         | Yes                                                      | Yes                                       | Yes                                                      | Can't tell                                            | Yes                                                                 | Yes                                                                                  | Can't tell                                         | Can't tell                                   | Yes                                     | Valuable                      | Unsure                                                       | Rich                                                |
| 23         | Yes                                                      | Yes                                       | Yes                                                      | Can't tell                                            | Yes                                                                 | Yes                                                                                  | Yes                                                | Yes                                          | Yes                                     | Valuable                      | Unsure                                                       | Poor                                                |
| 24         | Yes                                                      | Yes                                       | Yes                                                      | Yes                                                   | Yes                                                                 | Can't tell                                                                           | Can't tell                                         | Can't tell                                   | Yes                                     | Valuable                      | Unsure                                                       | Rich                                                |
| 25         | Yes                                                      | Yes                                       | Yes                                                      | Can't tell                                            | Yes                                                                 | Yes                                                                                  | Can't tell                                         | Can't tell                                   | Yes                                     | Valuable                      | Unsure                                                       | Rich                                                |
| 26         | Yes                                                      | Yes                                       | Yes                                                      | Can't tell                                            | Can't tell                                                          | Can't tell                                                                           | Yes                                                | Can't tell                                   | Yes                                     | Valuable                      | Unsure                                                       | Rich                                                |
| 27         | Yes                                                      | Yes                                       | Yes                                                      | Yes                                                   | Yes                                                                 | Can't tell                                                                           | Can't tell                                         | Yes                                          | Yes                                     | Valuable                      | High                                                         | Rich                                                |

<sup>1</sup>Abboud-2002, <sup>2</sup>Abboud-2005, <sup>3</sup>Armstrong, <sup>4</sup>Brady, <sup>5</sup>Bute, <sup>6</sup>Conway, <sup>7</sup>Cullen-2017, <sup>8</sup>Cullen-2018, <sup>9</sup>Defrain, <sup>10</sup>Edwards, <sup>11</sup>Ekelin, <sup>12</sup>Hamama-Raz, <sup>13</sup>Harris, <sup>14</sup>Hutti-1988, <sup>15</sup>Hutti-1992, <sup>16</sup>Johnson, <sup>17</sup>Kilshaw, <sup>18</sup>Letherby, <sup>19</sup>Meaney, <sup>20</sup>Miron, <sup>21</sup>Murphy-1997, <sup>22</sup>Murphy-1998, <sup>23</sup>Peters, <sup>24</sup>Puddifoot, <sup>25</sup>Radwan-Speraw, <sup>26</sup>Sehdev, <sup>27</sup>Wagner.
